# Supplementary material for: A Screen for Endocytic Motifs
Source: PubMed Central journal article supplement (PMC2882754; doi:10.1111/j.1600-0854.2010.01056.x), 2010-04-05
Supplement: tra0011-0843-SD6.pdf [file tra0011-0843-SD6.pdf]

**Table S1.** List of proteins with YXXXΦN sequence in the cytosolic tail.

| PrimaryID       | Function                                                                                                                                             |
|-----------------|------------------------------------------------------------------------------------------------------------------------------------------------------|
| ENSP00000334828 | CUB and sushi multiple domains 1 protein                                                                                                             |
| NP_000132       | K-sam-IIH3                                                                                                                                           |
| AAH14484        | TOR1A protein                                                                                                                                        |
| NP_075261       | fibroblast growth factor receptor 2 isoform 5 precursor                                                                                              |
| ENSP00000373212 | ADAMTS-9 precursor (EC 3.4.24.-) (A disintegrin and metalloproteinase with thrombospondin motifs 9) (ADAM-TS 9) (ADAM-TS9).                          |
| ENSP00000215069 | Uncharacterized protein C19orf15 precursor.                                                                                                          |
| ENSP00000368317 | Neuronal cell adhesion molecule precursor (Nr-CAM) (NgCAM-related cell adhesion molecule) (Ng-CAM-related) (hBravo).                                 |
| NP_000104       | torsin A                                                                                                                                             |
| ENSP00000286301 |                                                                                                                                                      |
| NP_075417       | fibroblast growth factor receptor 2 isoform 10 precursor                                                                                             |
| ENSP00000369550 | Retinal guanylyl cyclase 1 precursor (EC 4.6.1.2) (Guanylate cyclase 2D, retinal) (RETGC-1) (Rod outer segment membrane guanylate cyclase) (ROS-GC). |
| ENSP00000266744 | achaete scute protein                                                                                                                                |
| NP_000777       | cytochrome P450, family 51                                                                                                                           |
| ENSP00000354228 | calcium channel, voltage-dependent, alpha 2/delta subunit 2 isoform b                                                                                |
| NP_005205       | CTLA4                                                                                                                                                |
| NP_075264       | fibroblast growth factor receptor 2 isoform 8 precursor                                                                                              |
| NP_075263       | fibroblast growth factor receptor 2 isoform 7 precursor                                                                                              |
| XP_938838       | RW1 protein isoform 5                                                                                                                                |
| ENSP00000310565 | C18orf4 protein                                                                                                                                      |
| ENSP00000366603 | hTGN51                                                                                                                                               |
| NP_075419       | fibroblast growth factor receptor 2 isoform 12 precursor                                                                                             |
| NP_054699       | receptor tyrosine kinase                                                                                                                             |
| NP_000519       | mannosidase, alpha, class 2B, member 1 precursor                                                                                                     |
| ENSP00000265342 | hypothetical protein                                                                                                                                 |
| ENSP00000353851 | Torsin A precursor (Torsin family 1 member A) (Dystonia 1 protein).                                                                                  |
| ENSP00000295754 | TGF-betaIIIR alpha                                                                                                                                   |
| ENSP00000261304 | galactosylceramidase isoform a precursor                                                                                                             |
| ENSP00000362125 | Protocadherin-19 precursor.                                                                                                                          |
| ENSP00000373211 | ADAMTS-9 precursor (EC 3.4.24.-) (A disintegrin and metalloproteinase with thrombospondin motifs 9) (ADAM-TS 9) (ADAM-TS9).                          |
| ENSP00000321821 | CYP4F12 protein                                                                                                                                      |
| ENSP00000365820 | Low-density lipoprotein receptor-related protein 5 precursor.                                                                                        |
| NP_891550       | ADAM metalloproteinase with thrombospondin type 1 motif, 9 preproprotein                                                                             |
| NP_075262       | fibroblast growth factor receptor 2 isoform 6 precursor                                                                                              |
| ENSP00000373213 | ADAMTS-9 precursor (EC 3.4.24.-) (A disintegrin and metalloproteinase with thrombospondin motifs 9) (ADAM-TS 9) (ADAM-TS9).                          |
| ENSP00000358765 | Trophoblast glycoprotein precursor (5T4 oncofetal trophoblast glycoprotein) (5T4 oncotrophoblast glycoprotein) (5T4 oncofetal antigen) (M6P1).       |
| BAC04415        |                                                                                                                                                      |
| ENSP00000312001 | leucine rich repeat neuronal 3                                                                                                                       |
| ENSP00000252483 | Poliovirus receptor-related protein 2 precursor (Herpes virus entry mediator B) (HveB) (Nectin-2) (CD112 antigen).                                   |
| AAH28933        | FCRL3 protein                                                                                                                                        |
| NP_006197       | platelet-derived growth factor receptor alpha precursor                                                                                              |
| ENSP00000350356 | NT-3 growth factor receptor precursor (EC 2.7.10.1) (Neurotrophic tyrosine kinase receptor type 3) (TrkC tyrosine kinase) (GP145-TrkC) (Trk-C).      |
| ENSP00000358061 | Fibroblast growth factor receptor 2 precursor (EC 2.7.10.1) (FGFR-2) (Keratinocyte growth factor receptor 2) (CD332 antigen).                        |
| ENSP00000294304 | LDL receptor member LR3                                                                                                                              |

|                 |                                                                                                                                                                                                                                                                 |
|-----------------|-----------------------------------------------------------------------------------------------------------------------------------------------------------------------------------------------------------------------------------------------------------------|
| NP_001014796    | discoidin domain receptor family, member 2 precursor                                                                                                                                                                                                            |
| ENSP00000364785 | Ephrin type-A receptor 2 precursor (EC 2.7.10.1) (Tyrosine-protein kinase receptor ECK) (Epithelial cell kinase).                                                                                                                                               |
| ENSP00000311265 | Complement C1q tumor necrosis factor-related protein 1 precursor (G protein-coupled receptor-interacting protein) (GIP).                                                                                                                                        |
| ENSP00000317128 | plexin D1                                                                                                                                                                                                                                                       |
| NP_075418       | fibroblast growth factor receptor 2 isoform 11 precursor                                                                                                                                                                                                        |
| NP_004516       | gp330 precursor                                                                                                                                                                                                                                                 |
| ENSP00000365759 | Epithelial discoidin domain-containing receptor 1 precursor (EC 2.7.10.1) (Epithelial discoidin domain receptor 1) (Tyrosine kinase DDR) (Discoidin receptor tyrosine kinase) (Tyrosine-protein kinase CAK) (Cell adhesion kinase) (TRK E) (Protein-tyrosine ki |
| ENSP00000261349 | LDL receptor-related protein 6                                                                                                                                                                                                                                  |
| ENSP00000364643 | Long palate, lung and nasal epithelium carcinoma-associated protein 3 precursor (Ligand-binding protein RYA3).                                                                                                                                                  |
| ENSP00000303713 | mucin 15                                                                                                                                                                                                                                                        |
| NP_054700       | discoidin domain receptor family, member 1 isoform c                                                                                                                                                                                                            |
| NP_004434       | ephrin receptor EphB3 precursor                                                                                                                                                                                                                                 |
| ENSP00000367433 | Adherens junction-associated protein 1 (Membrane protein shrew-1).                                                                                                                                                                                              |
| ENSP00000321345 | Interleukin-23 receptor precursor (IL-23R).                                                                                                                                                                                                                     |
| ENSP00000216286 | osteonidogen                                                                                                                                                                                                                                                    |
| XP_938643       | hypothetical protein LOC57186 isoform 3                                                                                                                                                                                                                         |
| NP_075258       | fibroblast growth factor receptor 2 isoform 2 precursor                                                                                                                                                                                                         |
